# Supplementary material for: Photo-sensitive benzoxazine II: chalcone-containing benzoxazine and its photo and thermal-cured thermoset
Source: Royal Society of Chemistry journal article supplement (doi:10.1039/c7ra06967g), 2017-01-01
Supplement: c7ra06967g1.pdf [file c7ra06967g1.pdf]

## Supplementary information

# Photo-sensitive benzoxazine II: Chalcone-containing benzoxazine and its photo and thermal-cured thermoset

Ching Hsuan Lin,<sup>\*a</sup> Chun Kai Chien,<sup>a</sup> Chien Han Chen,<sup>a</sup> Tzong Yuan Juang<sup>\*b</sup>

<sup>a</sup>Department of Chemical Engineering, National Chung Hsing University, Taichung, Taiwan.

<sup>b</sup>Department of Cosmeceutics, China Medical University, Taichung, Taiwan

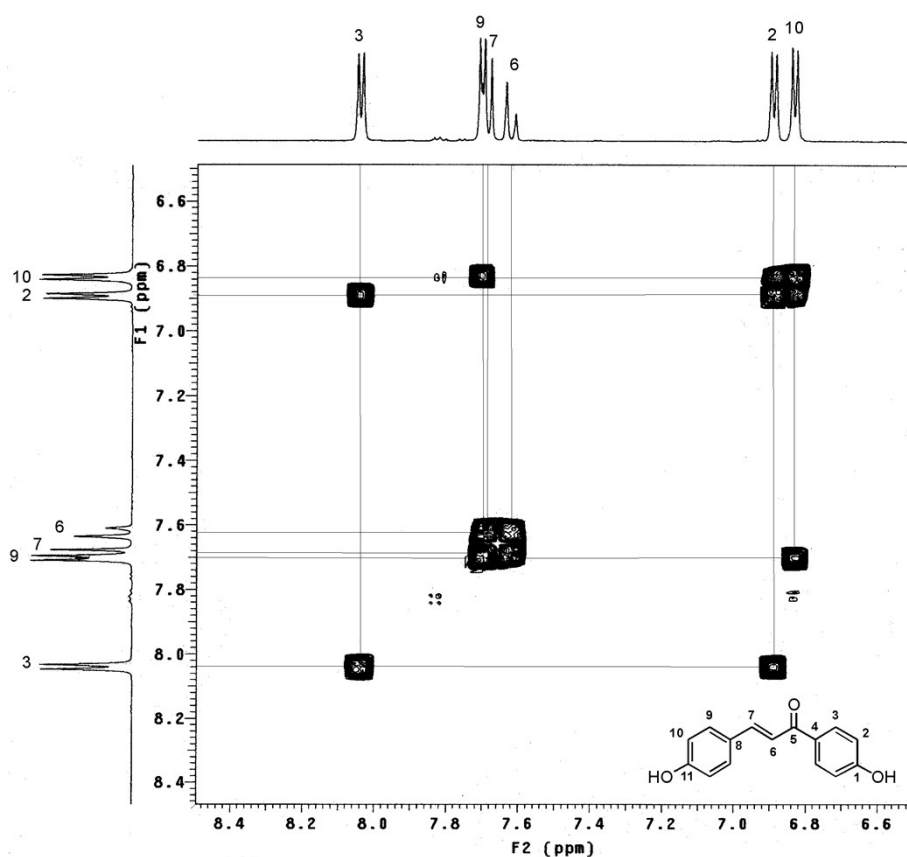

Figure S1. <sup>1</sup>H-<sup>1</sup>H COSY of BHP.

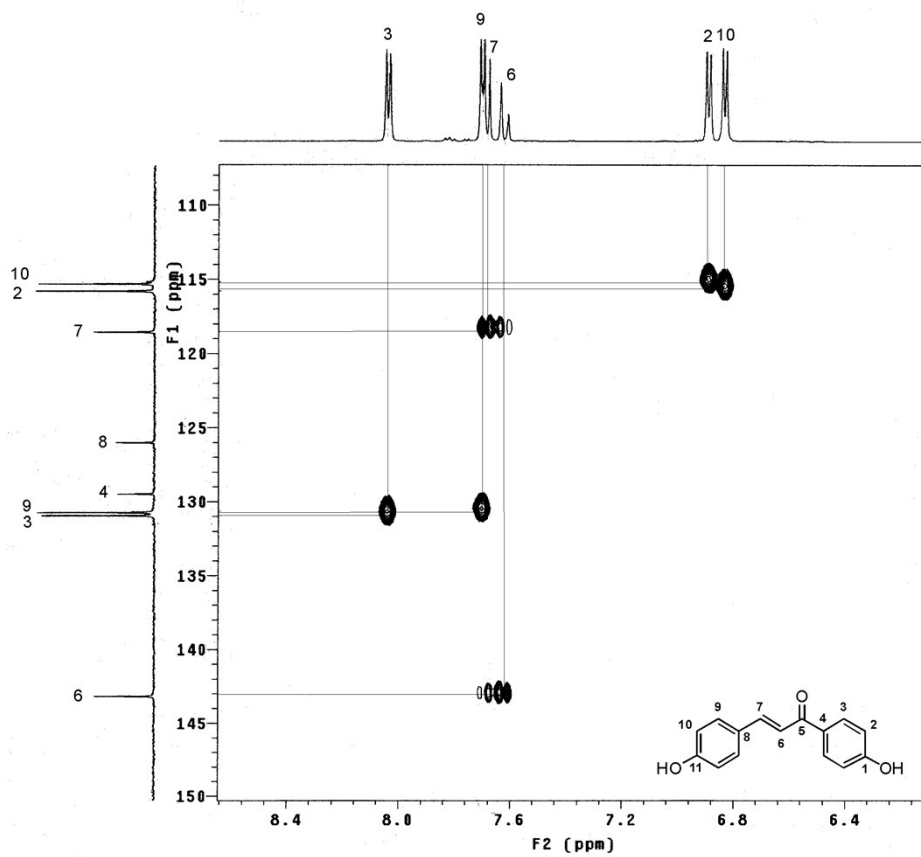

Figure S2.  $^1\text{H}$ - $^{13}\text{C}$  HETCOR of BHP.

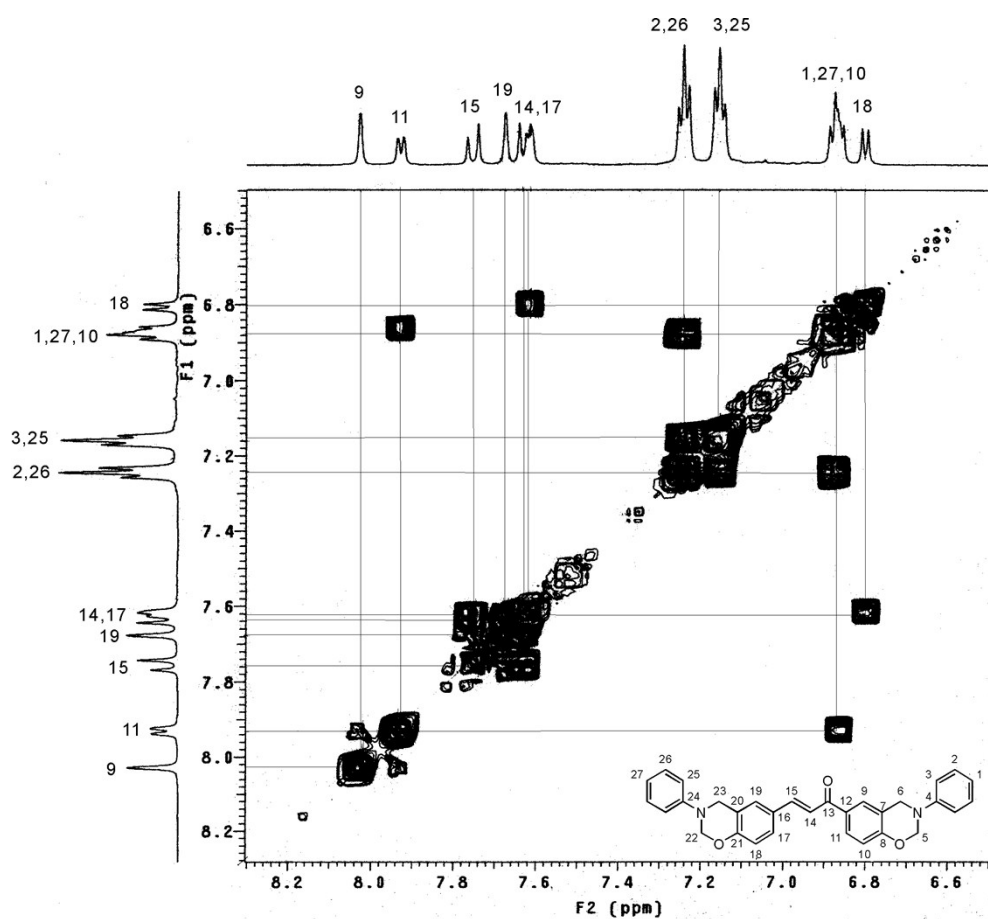

Figure S3.  $^1\text{H}$ - $^1\text{H}$  COSY of BHP-a.

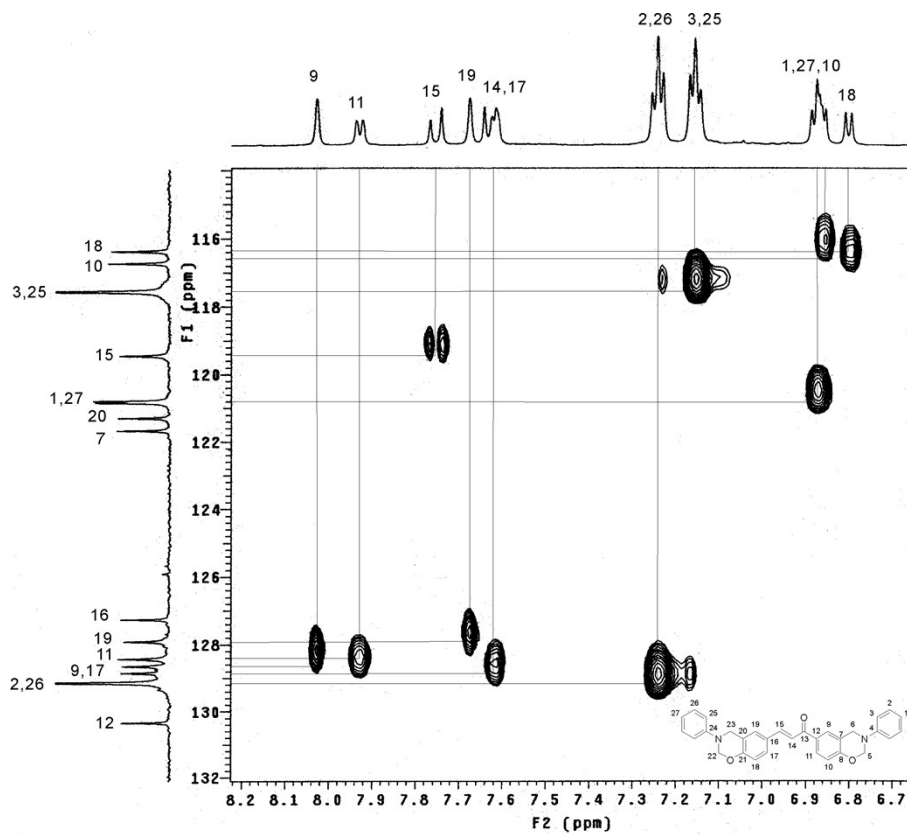

**Figure S4.**  $^1\text{H}$ - $^{13}\text{C}$  HERCOR of BHP-a.

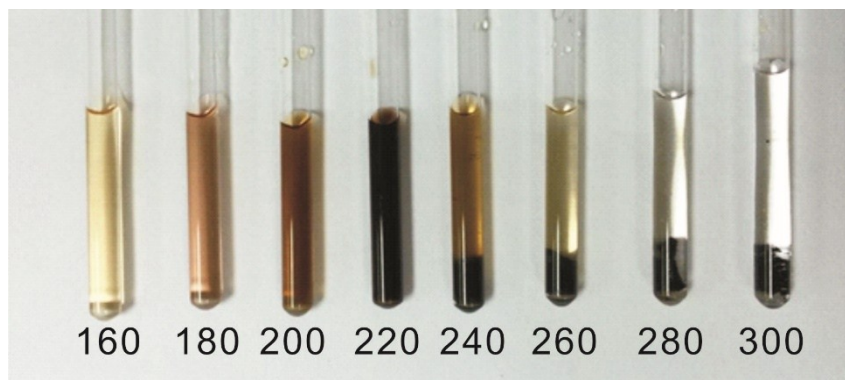

**Figure S5.** A photo of BHP in DMSO after accumulative curing at each temperature for 20 min.
